# Supplementary material
Source: publisher figshare collection journal article supplement (https://gsajournals.figshare.com/ndownloader/files/13612946)
Supplement: Supplementary file 1 [file 13612946]

## Sheet: Figure 2 D
		day 1 counts			day 2 counts
	replicate number	exposed	unexposed		exposed	unexposed
	1	29	156		14	98
	2	32	217		12	124
	3	21	336		19	107
	4	57	242		47	113
	5	61	226		30	156
	6	53	208		26	192
	7	36	277		15	101
	8	62	209		71	137
	9	28	92		28	365
	10	17	117		0	213
	11	98	297		21	117
	12	47	355		27	139
	total eggs	541	2732	total eggs	310	1862
	std dev	22.8053	80.9246	std dev	19.2255	75.107
	sem	6.58333	23.3609	sem	5.54991	21.6815
	average	45.0833	227.667	average	25.8333	155.167
	normalized proportion	0.198023	1	normalized proportion	0.166488	1
	pvalue		4.92567e-06			7.73244e-05

## Sheet: Figure 2 E
		day 1 counts			day 2 counts
	replicate number	exposed	unexposed		exposed	unexposed
	1	7	148		63	102
	2	39	151		39	107
	3	23	123		19	77
	4	9	136		17	129
	5	17	167		8	131
	6	36	121		15	117
	7	43	134		22	108
	8	16	102		18	101
	9	38	101		49	114
	10	17	114		21	131
	11	14	158		22	98
	12	18	107		39	84
	total eggs	277	1562	total eggs	332	1299
	std dev	12.5369	22.3803	std dev	16.6089	17.4206
	sem	3.6191	6.46064	sem	4.79457	5.02889
	average	23.0833	130.167	average	27.6667	108.25
	normalized proportion	0.177337	1	normalized proportion	0.255581	1
	pvalue		4.33562e-11			6.61916e-11

## Sheet: Figure 3 A
		day 1 counts			day 2 counts
	replicate number	exposed	unexposed		exposed	unexposed
	1	76	26		83	95
	2	60	56		107	140
	3	75	31		118	111
	4	21	20		111	116
	5	24	24		107	88
	6	41	36		104	115
	7	44	22		104	102
	8	45	16		103	94
	9	42	44		100	122
	10	53	20		109	102
	11	50	40		68	98
	12	48	16		123	79
	total eggs	579	351	total eggs	1237	1262
	std dev	16.7881	12.4691	std dev	14.0006	16.5795
	sem	4.84631	3.59951	sem	4.04164	4.78608
	average	48.25	29.25	average	103.083	105.167
	normalized proportion	1.64957	1	normalized proportion	0.98019	1
	pvalue		0.00500336			0.748125

## Sheet: Figure 3 B
		day 1 counts			day 2 counts
	replicate number	exposed	unexposed		exposed	unexposed
	1	18	13		119	78
	2	17	13		143	73
	3	32	15		137	86
	4	26	11		164	69
	5	16	18		135	70
	6	91	26		116	96
	7	46	27		107	103
	8	36	8		137	60
	9	82	17		113	83
	10	36	20		130	99
	11	47	18		92	82
	12	12	20		170	94
	total eggs	459	206	total eggs	1563	993
	std dev	25.3669	5.67023	std dev	19.7549	13.3969
	sem	7.32278	1.63685	sem	5.70274	3.86736
	average	38.25	17.1667	average	130.25	82.75
	normalized proportion	2.22816	1	normalized proportion	1.57402	1
	pvalue		0.0156498			6.86691e-06

## Sheet: Figure 3 C
		day 1 counts			day 2 counts
	replicate number	exposed	unexposed		exposed	unexposed
	1	53	72		72	91
	2	47	32		62	76
	3	52	47		64	84
	4	51	68		76	91
	5	62	80		58	101
	6	37	65		53	58
	7	60	61		91	92
	8	43	41		56	88
	9	41	23		54	66
	10	62	60		49	98
	11	25	50		68	68
	12	31	45		66	79
	total eggs	564	644	total eggs	769	992
	std dev	12.0151	16.9509	std dev	12.2593	13.439
	sem	3.46847	4.89331	sem	3.53896	3.8795
	average	47	53.6667	average	64.0833	82.6667
	normalized proportion	0.875776	1	normalized proportion	0.775202	1
	pvalue		0.279651			0.00158064

## Sheet: Figure 4 A
		day 1 counts			day 2 counts
	replicate number	exposed	unexposed		exposed	unexposed
	1	23	70		72	103
	2	9	95		76	102
	3	25	24		57	84
	4	7	33		82	96
	5	17	30		63	93
	6	42	29		58	104
	7	35	38		39	52
	8	34	34		46	54
	9	26	43		81	51
	10	4	42		75	53
	11	30	42		77	34
	12	34	24		53	38
	total eggs	286	504	total eggs	779	864
	std dev	12.2462	20.7057	std dev	14.4983	27.2564
	sem	3.53518	5.97723	sem	4.18529	7.86823
	average	23.8333	42	average	64.9167	72
	normalized proportion	0.56746	1	normalized proportion	0.90162	1
	pvalue		0.0175772			0.436728

## Sheet: Figure 4 B
		day 1 counts			day 2 counts
	replicate number	exposed	unexposed		exposed	unexposed
	1	51	140		141	109
	2	39	137		143	93
	3	40	135		156	103
	4	52	143		150	134
	5	38	92		176	77
	6	21	109		104	75
	7	50	111		98	106
	8	42	86		146	80
	9	104	134		145	79
	10	87	116		131	129
	11	24	119		125	100
	12	29	75		145	134
	total eggs	577	1397	total eggs	1660	1219
	std dev	24.5559	22.7015	std dev	22.4325	21.9357
	sem	7.08868	6.55335	sem	6.47571	6.33229
	average	48.0833	116.417	average	138.333	101.583
	normalized proportion	0.413028	1	normalized proportion	1.36177	1
	pvalue		4.38139e-07			0.000423185

## Sheet: Figure 4 C
		day 1 counts			day 2 counts
	replicate number	exposed	unexposed		exposed	unexposed
	1	8	56		91	65
	2	13	44		59	61
	3	13	40		114	61
	4	21	66		54	80
	5	10	58		80	75
	6	18	70		85	65
	7	14	71		67	68
	8	21	82		82	89
	9	25	17		110	51
	10	14	63		57	97
	11	39	67		109	85
	12	33	41		88	76
	total eggs	229	675	total eggs	996	873
	std dev	9.36588	17.879	std dev	21.8877	13.3561
	sem	2.7037	5.16123	sem	6.31844	3.85558
	average	19.0833	56.25	average	83	72.75
	normalized proportion	0.339259	1	normalized proportion	1.14089	1
	pvalue		7.64885e-06			0.169178

## Sheet: Figure 4 D
		day 1 counts			day 2 counts
	replicate number	exposed	unexposed		exposed	unexposed
	1	3	32		67	48
	2	9	47		87	55
	3	14	27		38	45
	4	10	25		51	41
	5	8	32		73	23
	6	9	36		73	40
	7	9	32		104	42
	8	20	43		55	58
	9	30	26		70	31
	10	21	20		66	45
	11	21	27		55	44
	12	23	34		100	41
	total eggs	177	381	total eggs	839	513
	std dev	8.04674	7.65299	std dev	17.9879	9.36264
	sem	2.32289	2.20923	sem	5.19265	2.70276
	average	14.75	31.75	average	69.9167	42.75
	normalized proportion	0.464567	1	normalized proportion	1.63548	1
	pvalue		2.5574e-05			0.000529283

## Sheet: Figure 4 E
		day 1 counts			day 2 counts
	replicate number	exposed	unexposed		exposed	unexposed
	1	36	57		150	122
	2	39	61		164	140
	3	25	95		102	153
	4	39	61		131	135
	5	25	55		164	138
	6	43	71		185	154
	7	25	54		115	106
	8	16	72		160	139
	9	10	123		179	107
	10	17	224		240	119
	11	61	136		171	120
	12	91	139		132	114
	total eggs	87	1148	total eggs	1893	1547
	std dev	22.391	51.5035	std dev	37.241	16.5335
	sem	6.46372	14.8678	sem	10.7505	4.77281
	average	35.5833	95.6667	average	157.75	128.917
	normalized proportion	0.371951	1	normalized proportion	1.22366	1
	pvalue		0.00210942			0.0243424

[truncated: 32 more sheets: Figure 4 F, Figure 4 G, Figure 4 H, Figure 4 I, Figure 4 J, Figure 4 K, Figure 4 L, S Figure 1 A, S Figure 1 B, S Figure 1 C, S Figure 4 A, S Figure 4 B, S Figure 4 C, S Figure 4 D, S Figure 5 A, S Figure 5 B, S Figure 5 C, S Figure 5 D, S Figure 6 A, S Figure 6 B …]
